# Supplementary material
Source: PubMed Central journal article supplement (PMC5568677)
Supplement: NIHMS889432-supplement-3.pdf [file NIHMS889432-supplement-3.pdf]

## Inventory of Supplemental Items

Figure S1. Characterization of E100K mutation in GCL, Related to Figure 1

Figure S2. Purification of GCL-interacting protein complexes from *Drosophila* embryo lysates, Related to Figure 2

Figure S3. Assessment of the conserved GCL domain, Related to Figure 3

Figure S4. *gcl*, *tsl* double mutant embryos accumulate Torso protein and show phenotypes associated with the defects in the Torso signaling pathway, Related to Figure 4

Figure S5. The canonical Torso signaling pathway components do not inhibit PGC formation, Related to Figure 4

Figure S6. Assessment of Torso<sup>Deg</sup> mutant, Related to Figure 5

### Supplemental Tables

Table S1. Complete list of mass spectrometry results of GCL immunocomplexes, Related to Figure 2 and Figure S2

Key Resource Table
